# Supplementary material
Source: PubMed Central journal article supplement (PMC4370985)
Supplement: 11606_2014_3119_MOESM1_ESM.pdf [file 11606_2014_3119_MOESM1_ESM.pdf]

**Table 1: South Huntington Staffing Model**

|                      | Patient Population | MD   | PA   | LPN | MA | LICSW | RN Care Manager | PharmD | Registered Dietician | Community Health Admin | Population Manager | Community Resource Specialist | Consulting Psychiatrist | Consulting Geriatrician |
|----------------------|--------------------|------|------|-----|----|-------|-----------------|--------|----------------------|------------------------|--------------------|-------------------------------|-------------------------|-------------------------|
| Original Plan        | 10,000             | 3.75 | 3    | 3   | 7  | 3     | 2               | 1      | 1                    | 0                      | 6                  | 1                             | 0.1                     | 0.1                     |
| Current State        | 7,000              | 3.75 | 2.75 | 3.6 | 6  | 3     | 1               | 1      | 1                    | 1                      | 6                  | 0.5                           | 0.1                     | 0.1                     |
| Expected Final State | 10,350             | 4.5  | 2.75 | 3.6 | 6  | 3     | 2               | 1      | 1                    | 1                      | 6                  | 0.5                           | 0.1                     | 0.1                     |
